# Supplementary material
Source: PubMed Central journal article supplement (PMC3624267)

## **Supplementary material:**

### **Supplementary table 1: Data collection and refinement statistics**

### **Supplementary Fig. SI1: All tested FKBP-rapamycin complexes bind to FRB domain of mTOR with high affinity.**

FRET binding assay with recombinant GST-FRB and eGFP-FKBPs: half-logarithmic plot of the rapamycin concentration against the observed FRET ratio (Em 520 nm/ Em 495 nm). 5 nM GST-FRB, 100 nM eGFP-FKBPs and 2.5 nM of a Terbium-labelled anti-GST antibody were used. Rapamycin was titrated from 0 to 5  $\mu$ M (●FKBP12.6; ○FKBP12; ▼FKBP13; ΔFKBP25; ■FKBP51; □FKBP52).

### **Supplementary Fig. SI2: Six different FKBP proteins reduce mTOR activity with nanomolar IC<sub>50</sub> values in a rapamycin-dependent manner.**

FRET-based mTOR activity assay, containing purified truncated mTOR and eGFP-4E-BP1 as a substrate: half-logarithmic plot of a rapamycin titration (0 – 1000 nM) against observed FRET ratio (Em 520 nm / Em 495 nm) in presence of 100 nM FKBP protein (●FKBP12; ○FKBP12.6; ▲FKBP13; ΔFKBP25; ■FKBP51; □FKBP52).

### **Supplementary Fig. SI3: FKBP12 and FKBP51 FK1 mediate growth inhibition by rapamycin.**

Growth curves demonstrate that FKBP12 and FKBP51 FK1 have a similar effect on yeast cells: In glucose medium (SD, which will repress expression of FKBP proteins) or galactose containing medium (SG, which will induce expression of FKBP proteins), the indicated yeast clones were grown at 30°C in the presence or the absence of rapamycin (5  $\mu$ M final concentration). OD<sub>600</sub> was measured every 180 minutes and plotted against time.

**Supplementary Fig. SI4: In FKBP12-knockdown cells, rapamycin-induced Akt hyperphosphorylation is reduced compared to wild type cells.**

Cellular Akt phosphorylation was determined using a homogeneous time-resolved assay. SH-SY5Y neuroblastoma cells were starved for 24 h and stimulated with 10% FBS/100 nM insulin for 60 minutes in the presence of 0-3.5 nM rapamycin or 10 nM Torin-1. Mean values of three independent data points are shown.

**Supplementary Fig. SI5: FKBP51 overexpression increases rapamycin-induced Akt phosphorylation in HeLa cells**

HeLa cells were transfected for expression of FLAG-FKBP51 or empty plasmid. After 24 h, cells were starved for 24 h and then stimulated with serum and insulin for 60 minutes in presence of 0-25 nM rapamycin. Cells were lysed and subjected to immunoblotting analysis. (A) Western blot analysis and (B) densitometric analysis of phosphoS473 Akt signals (relative to load).

## Supplementary images and tables:

**Table S1:**

|                                     | FKBP51 FK1-<br>rapamycin-FRB   | FKBP51 FK1-<br>rapamycin-FRB<br>(low pH) | FKBP52 FK1-<br>rapamycin-FRB |
|-------------------------------------|--------------------------------|------------------------------------------|------------------------------|
| <b>Data collection</b>              |                                |                                          |                              |
| Space group                         | $P2_12_12_1$                   | $P3_112$                                 | $P2_12_12_1$                 |
| Cell dimensions<br>$a, b, c$ (Å)    | 59.48, 59.52,<br>67.78;        | 103.68, 103.68,<br>106.54;               | 58.52, 62.99,<br>70.14;      |
| $\alpha, \beta, \gamma$ (°)         | 90, 90, 90                     | 90, 90, 120                              | 90, 90, 90                   |
| Resolution (Å)                      | 59.48 - 1.45 (1.53<br>- 1.45)* | 89.80 - 2.3 (2.42 -<br>2.3)              | 70.19 - 1.8 (1.96 -<br>1.8)  |
| $R_{\text{merge}}$                  | 0.043 (0.377)                  | 0.081 (0.519)                            | 0.044 (0.350)                |
| $I / \sigma I$                      | 17.3 (3.3)                     | 18.3 (4.1)                               | 16.2 (3.0)                   |
| Completeness (%)                    | 95.7 (93.8)                    | 99.4 (98.8)                              | 99.0 (98.9)                  |
| Redundancy                          | 3.8 (3.5)                      | 7.4 (7.5)                                | 3.5 (3.6)                    |
| <b>Refinement</b>                   |                                |                                          |                              |
| Resolution (Å)                      | 19.05 - 1.45                   | 20 - 2.3                                 | 19.76 - 1.8                  |
| No. reflections                     | 39213                          | 27545                                    | 23105                        |
| $R_{\text{work}} / R_{\text{free}}$ | 0.1769 / 0.2064                | 0.1871 / 0.2259                          | 0.1883 / 0.2247              |
| No. atoms                           |                                |                                          |                              |
| Protein                             | 1794                           | 3517                                     | 1731                         |
| Ligand/ion                          | 65                             | 130 / 105                                | 65 / 5                       |
| Water                               | 223                            | 89                                       | 151                          |
| $B$ -factors                        |                                |                                          |                              |
| Protein                             | 24.56                          | 45.31                                    | 40.78                        |
| Ligand/ion                          | 15.74                          | 34.78 / 86.55                            | 24.44 / 54.82                |
| Water                               | 35.48                          | 41.87                                    | 44.79                        |
| R.m.s. deviations                   |                                |                                          |                              |
| Bond lengths (Å)                    | 0.014                          | 0.012                                    | 0.012                        |
| Bond angles (°)                     | 1.546                          | 1.450                                    | 1.287                        |

For each structure a single crystal was used. \*Values in parentheses are for highest-resolution shell.

**SI1:**

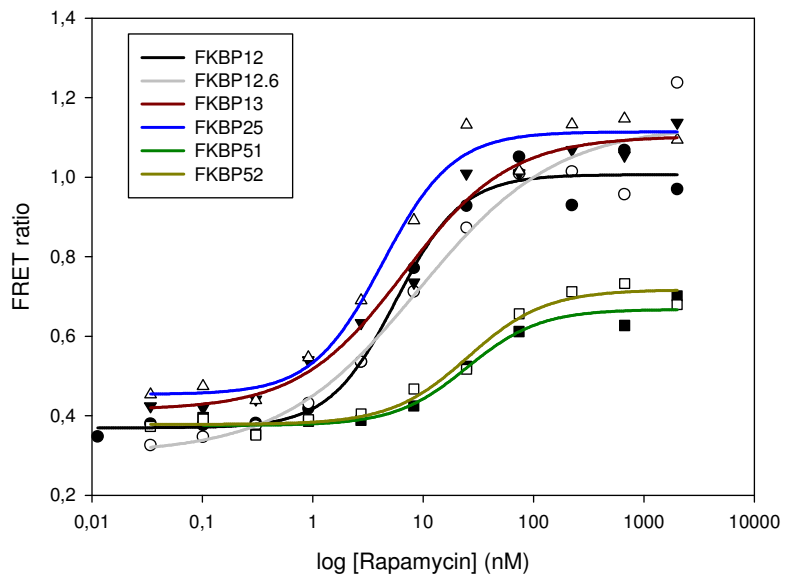

**SI2:**

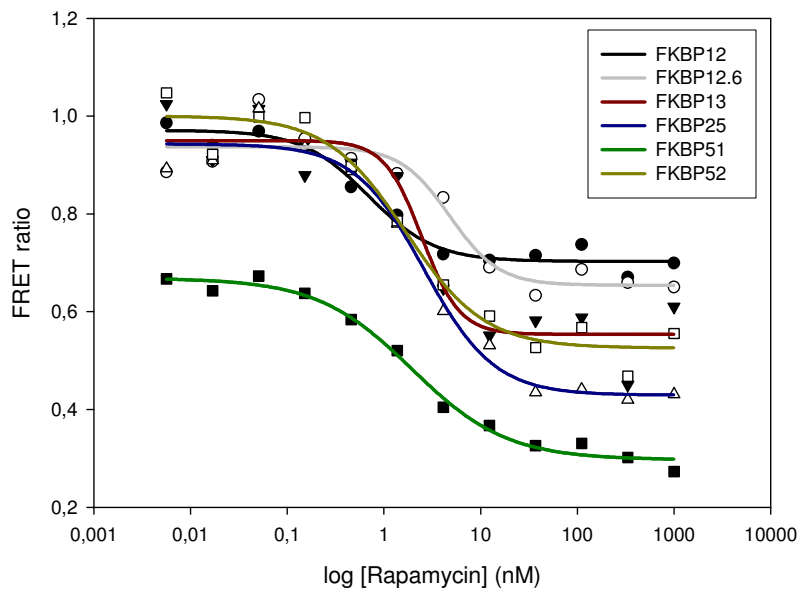

SI3:

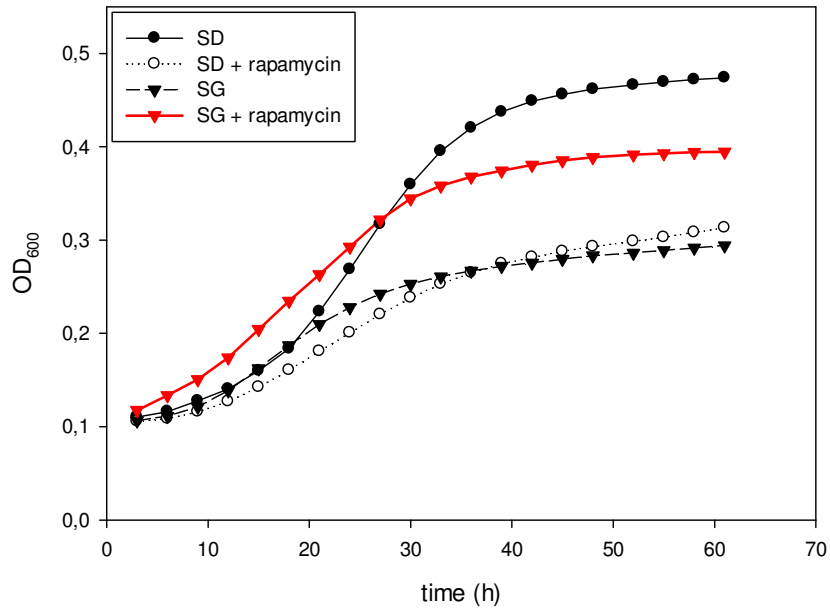

Deletion mutant  $\Delta$  + empty vector

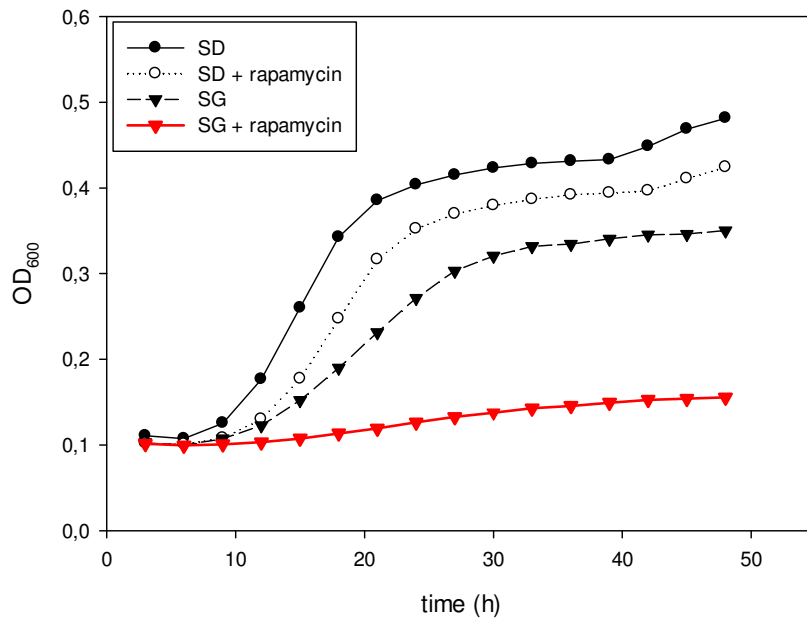

$\Delta$  + FKBP12

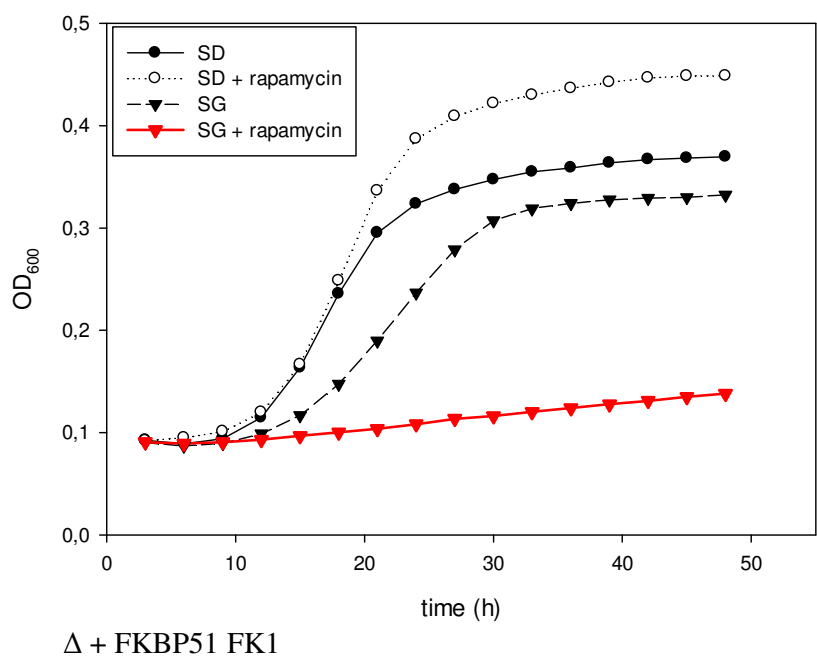

**SI4:**

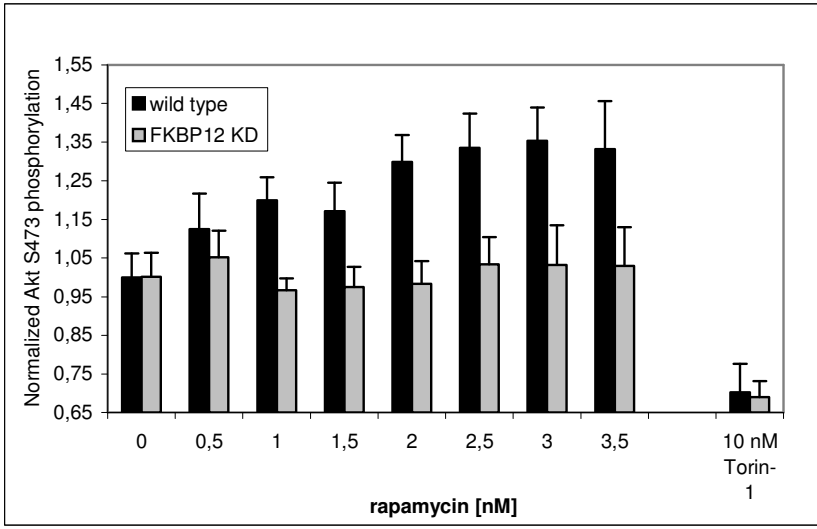

**SI5:**

**A**

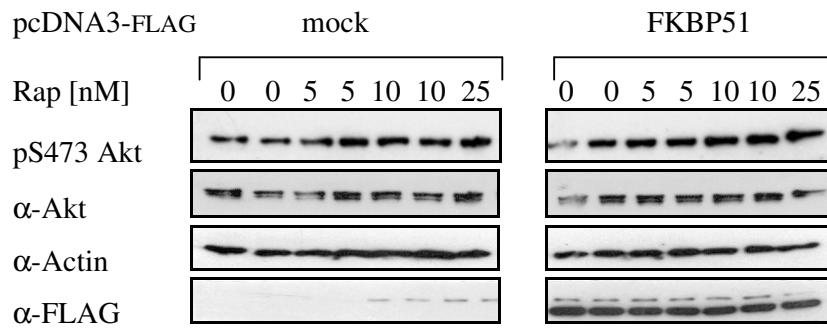

**B**

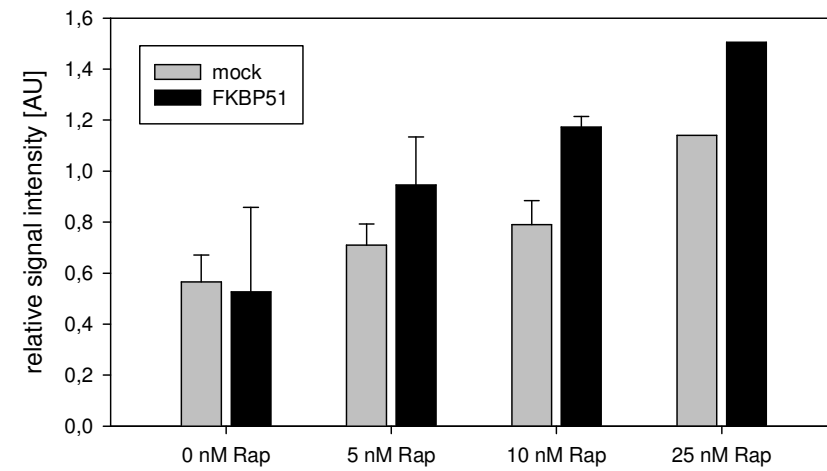

Supplement: MCB.00678-12_zmb999109912so1.pdf [file MCB.00678-12_zmb999109912so1.pdf]
